# Supplementary material for: Deletion of Mitochondrial Translocator Protein (TSPO) Gene Decreases Oxidative Retinal Pigment Epithelial Cell Death via Modulation of TRPM2 Channel
Source: MDPI journal article supplement (doi:10.3390/biology10050382), 2021-04-28
Supplement: s1 [file s1]

# **Deletion of mitochondrial translocator protein (TSPO) gene decreases oxidative retinal pigment epithelial cell death via modulation of TRPM2 channel**

**Dilek Özkaya<sup>1</sup>, Xinhua Shu<sup>2,3,4</sup>, Mustafa Nazıroğlu<sup>5,6</sup>**

<sup>1</sup>Department of Ophthalmology, Faculty of Medicine, Suleyman Demirel University, Isparta, Turkey

<sup>2</sup>Department of Biological and Biomedical Sciences, Glasgow Caledonian University, Glasgow G4 0BA, UK

<sup>3</sup>Department of Vision Science, Glasgow Caledonian University, Glasgow G4 0BA, UK

<sup>4</sup>School of Basic Medical Sciences, Shaoyang University, Shaoyang, P.R. China

<sup>5</sup>Neuroscience Research Center, Suleyman Demirel University, Isparta, Turkey

<sup>6</sup>Drug Discovery Unit, BSN Health, Analyses, Innovation, Consultancy, Organization, Agriculture, Ltd., Isparta, Turkey

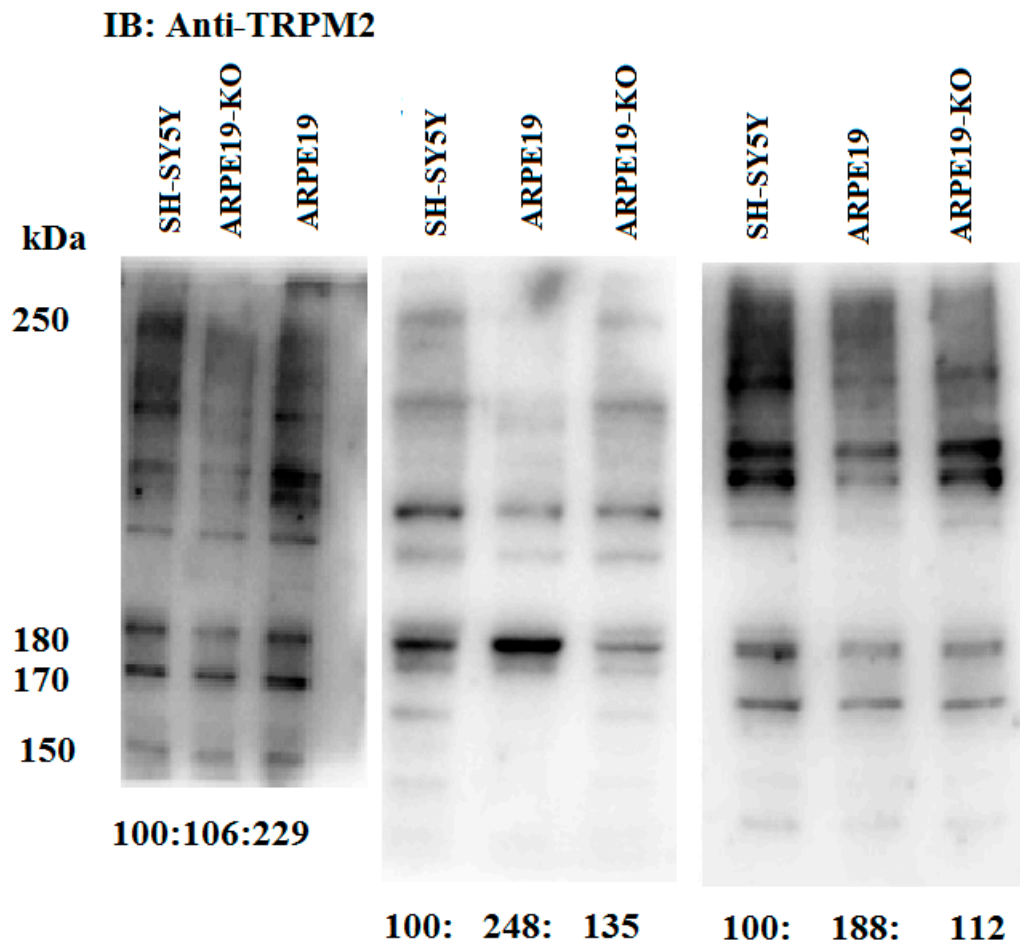

**Supplementary Figure 1. The row data of TRPM2 protein expression level in the SH-SY5Y, ARPE19, and ARPE19-KO cells.** (Mean  $\pm$  SD and n=3). For the expression levels of TRPM2 protein in the cells of SH-SY5Y, ARPE19, and ARPE19-KO, we used standard Western blot analyses. The protein bands of  $\beta$ -actin were used as control. 1:500. (b) Densitometry readings/intensity ratio, using ImageJ software and were normalized to the corresponding  $\beta$ -Actin value. The results were expressed in relative density changes.

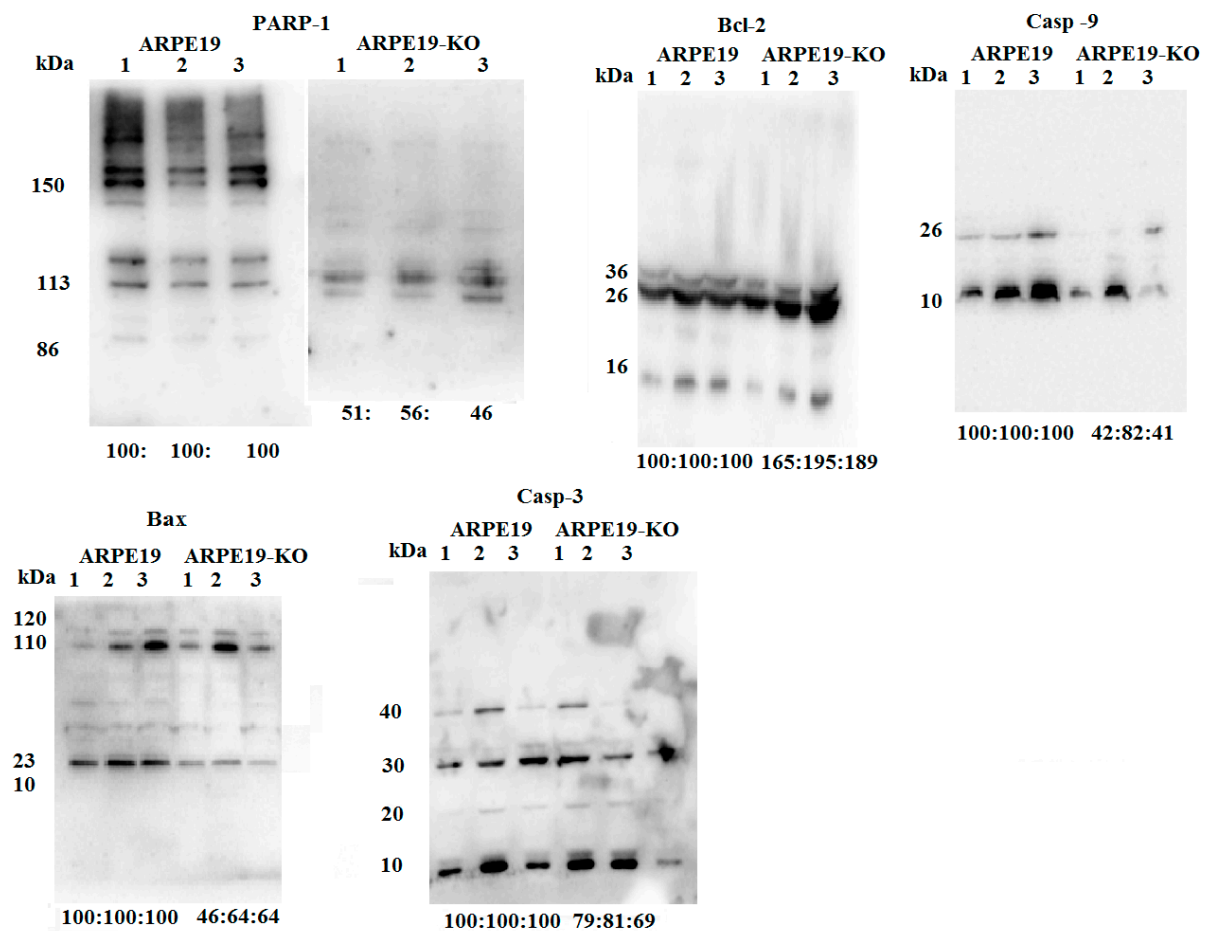

**Supplementary Figure 2. The row data of PARP-1, caspase-3 (Casp -3), caspase -9 (Casp -9), Bcl-2, and Bax in the ARPE19 and ARPE19-KO cells.** (Mean  $\pm$  SD and n=3). For the protein expression levels in the cells of ARPE19 and ARPE19-KO, we used standard Western blot analyses. The protein bands of  $\beta$ -actin were used as control. The protein bands of  $\beta$ -actin were used as control. 1:200-1:1000. (b) Densitometry readings/intensity ratio, using ImageJ software and were normalized to the corresponding  $\beta$ -Actin value. The results were expressed in relative density changes.
